# Supplementary material
Source: HighWire-hosted journal article supplement (https://hw-f5-jim.highwire.org/content/67/7/1082)
Supplement: inline-supplementary-material-1 [file inline-supplementary-material-1.pdf]

**Supplementary Table S1. Associations of serum levels of soluble alpha Klotho (s $\alpha$ Kl) and K6 score with psychological stress and sleeping conditions in female subjects**

|                       | s $\alpha$ Kl |         | K6 score |          |
|-----------------------|---------------|---------|----------|----------|
|                       | $\tau$        | P-value | $\tau$   | P-value  |
| Stress awareness      | -0.030        | 0.610   | *0.250   | < 0.0001 |
| Stress management     | 0.004         | 0.948   | *0.298   | < 0.0001 |
| Relaxation from sleep | 0.059         | 0.330   | *0.221   | < 0.0001 |

\* P < 0.05.

s $\alpha$ Kl, soluble alpha-klotho; K6, Kessler Screening Scale for Psychological Distress.

We evaluated the association of serum levels of s $\alpha$ Kl and K6 score with psychological stress and sleeping conditions in female subjects (n = 100). However, unlike in male subjects, serum levels of s $\alpha$ Kl exhibited no correlation between stress awareness, stress management, or relaxation from sleep. Similar to male subjects, the K6 score significantly correlated with stress awareness, stress management, and relaxation from sleep.
