# Supplementary material
Source: HighWire-hosted journal article supplement (https://hw-f5-jim.highwire.org/content/67/7/1082)
Supplement: inline-supplementary-material-2 [file inline-supplementary-material-2.pdf]

**Supplementary Table S2. Associations of serum levels of soluble alpha Klotho (s $\alpha$ Kl) between psychological stress and sleeping conditions in younger group and elder group**

|                       | younger group        |         | elder group          |         |
|-----------------------|----------------------|---------|----------------------|---------|
|                       | 44 (42.8–46.0) years |         | 53 (51.8–55.0) years |         |
|                       | $\tau$               | P-value | $\tau$               | P-value |
| Stress awareness      | –0.043               | 0.582   | 0.031                | 0.756   |
| Stress management     | –0.006               | 0.949   | 0.035                | 0.719   |
| Relaxation from sleep | 0.070                | 0.324   | –0.142               | 0.109   |

We considered the involvement of menopause in the association between psychological stress and s $\alpha$ Kl levels among female subjects. We divided the female subjects into two groups, by 50 years of age: the average age of menopause in our country (*Kono et al. Maturitas, 1990*). We evaluated the associations of s $\alpha$ Kl levels with stress awareness, stress management, and relaxation from sleep in younger group (< 50 years, n = 60) and elder group ( $\geq$  50 years, n = 40); however, serum levels of s $\alpha$ Kl exhibited no significant association between stress awareness, stress management, or relaxation from sleep in both groups.
